# Supplementary material
Source: ML conference proceedings conference paper supplement (https://proceedings.neurips.cc/paper_files/paper/2018/hash/390e982518a50e280d8e2b535462ec1f-Abstract.html)
Supplement: Supplementary file [file 390e982518a50e280d8e2b535462ec1f-Supplemental.zip]

---

# Automatic Program Synthesis of Long Programs with a Learned Garbage Collector

---

Amit Zohar<sup>1</sup>

Lior Wolf<sup>1 2</sup>

<sup>1</sup>The School of Computer Science, Tel Aviv University

<sup>2</sup>Facebook AI Research

## 1 Some Attempts to Apply Reinforcement Learning

A prominent limitation of our method is the reliance, during training, on a supervision in the form of an existing solution. First, the solution does not need to be unique, and many input/output pairs have multiple valid programs that map the input to the output. Training to match one correct solution is probably suboptimal. Second, during test time, there is a search process from a current state to the end goal. It would be helpful if a method could optimize a success score during search, thereby continuing its learning to better solve the sample at hand.

An attractive alternative to supervised learning would be Reinforcement Learning (RL). We have attempted to solve the problem using multiple RL and RL-inspired approaches: (i) an AlphaGo [1] inspired approach; (ii) an imitation learning based approach, following [2]; and (iii) a more modest application of RL, in which we use self-critical training to optimize with respect to an organic scoring mechanism [3].

In the first approach, we initialized our policy network with supervised training and then applied further actor-critic training. Specifically, we used the A3C algorithm ([4]), which is considered amongst the state-of-the-art approaches in most RL settings. However, we found the model extremely unstable under these circumstances.

In the second approach, we treated the ground-truth program statements as expert behavior and attempted to imitate them with the algorithm from [2]. We also tried to apply this form of training on a supervised-learned model. In the article's formulation, this corresponds to initializing policy parameters with behavioral cloning, which should significantly increase learning speed. We hypothesize this approach failed because, while the ground-truth programs are correct solutions, they were generated randomly and thus do not represent any specific policy. Therefore, it is unreasonable to expect an approach that assumes the existence of an underlying policy to succeed.

In the third approach, we attempted several scoring mechanisms. One idea was, given a program state, to search for a correct solution from it. The score would then be the number of steps needed to reach termination. By optimizing with respect to this score, our model indirectly learns its real goal. Other scores were also tried, including a CIDEr variant for program similarity based on functions.

## 2 Example Programs

To illustrate the difficulty of the synthesis, we have attached a few long programs together with their I/O samples from our test dataset, that our model predicts successfully.

|                     |                                                                                          |
|---------------------|------------------------------------------------------------------------------------------|
| v0 ← [int]          | <i>Input:</i> [0], [1, 1, 0, 2, 0]                                                       |
| v1 ← [int]          | <i>Output:</i> 2                                                                         |
| v2 ← TAIL v1        |                                                                                          |
| v3 ← TAIL v0        | <i>Input:</i> [9, 12, 2, 0, 7, 8, 1, 3, 8, 4, 7, 4, 12, 2, 0], [0, 2, 1, 0]              |
| v4 ← DROP v3 v1     | <i>Output:</i> 0                                                                         |
| v5 ← MAX v4         |                                                                                          |
| v6 ← ACCESS v2 v4   | <i>Input:</i> [0], [0, 7, 6, 0, 1, 5, 4, 3, 3]                                           |
| v7 ← DROP v6 v4     | <i>Output:</i> 3                                                                         |
| v8 ← HEAD v7        |                                                                                          |
| v9 ← DROP v5 v7     | <i>Input:</i> [14, 4, 3, 1, 7, 7, 4, 6, 7, 0, 9, 13, 8, 10, 0, 3], [4, 3, 0, 1, 2, 0, 2] |
| v10 ← SORT v9       | <i>Output:</i> 2                                                                         |
| v11 ← MAX v10       |                                                                                          |
| v12 ← TAKE v11 v10  | <i>Input:</i> [0, 0, 0, 7, 5, 1, 7, 0, 0], [0, 0, 9, 6, 6, 5, 8, 9, 2, 8, 7, 9, 9, 1]    |
| v13 ← ACCESS v8 v12 | <i>Output:</i> 1                                                                         |

|                     |                                                 |
|---------------------|-------------------------------------------------|
| v0 ← [list]         | <i>Input:</i> [4, 2, 2, 0, 4, 3, 3]             |
| v1 ← TAIL v0        | <i>Output:</i> [3, 3, 4, 4]                     |
| v2 ← ACCESS v1 v0   |                                                 |
| v3 ← DROP v2 v0     | <i>Input:</i> [6, 2, 6, 2, 6, 5, 3, 2, 4, 7]    |
| v4 ← SORT v3        | <i>Output:</i> [4, 5, 6, 7, 7, 8]               |
| v5 ← DROP v2 v4     |                                                 |
| v6 ← FILTER (>0) v5 | <i>Input:</i> [1, 8, 0, 8, 3, 4, 5, 4, 2, 8, 2] |
| v7 ← REVERSE v6     | <i>Output:</i> [2, 3, 3]                        |
| v8 ← SORT v7        |                                                 |
| v9 ← MAP (+1) v8    | <i>Input:</i> [3, 1, 3, 0, 5, 4, 6, 6, 3]       |
| v10 ← HEAD v9       | <i>Output:</i> [2, 4, 4, 4]                     |
| v11 ← ACCESS v10 v9 |                                                 |
| v12 ← TAKE v11 v9   | <i>Input:</i> [1, 3, 0, 0, 0, 4, 0, 4]          |
|                     | <i>Output:</i> [2, 4, 5, 5]                     |

|                        |                                                                                                                             |
|------------------------|-----------------------------------------------------------------------------------------------------------------------------|
| v0 ← [list]            | <i>Input:</i> [2, 1, -1, 2, 4, -1, -1, 3, 1, 4, 4, 4, -1, 2, 0, 5], [57, 133, 220, 231, 186, 82, 45, 14, 227, 227, 89, 109] |
| v1 ← [list]            | <i>Output:</i> [6, 10]                                                                                                      |
| v2 ← MAX v1            |                                                                                                                             |
| v3 ← MAP (+1) v0       | <i>Input:</i> [1, 0, 7, -1, 1, 3, 7, 2, 5, 7, -1, 1, 4, 1], [188, 237, 212, 202, 50, 19, 232]                               |
| v4 ← REVERSE v3        | <i>Output:</i> [4, 6]                                                                                                       |
| v5 ← ZIPWITH (+) v4 v4 |                                                                                                                             |
| v6 ← FILTER (>0) v5    | <i>Input:</i> [17, 13, -1, 0, 8], [253, 51]                                                                                 |
| v7 ← REVERSE v6        | <i>Output:</i> [36, 64]                                                                                                     |
| v8 ← MIN v7            |                                                                                                                             |
| v9 ← TAKE v8 v7        |                                                                                                                             |
| v10 ← SORT v9          | <i>Input:</i> [6, 5, 0, 6, 3, 4, 1, 7, 7, 7, 3, 8], [42, 59, 64, 29, 186, 102, 186, 141]                                    |
| v11 ← REVERSE v10      | <i>Output:</i> [14, 26]                                                                                                     |
| v12 ← SCAN1L (+) v11   |                                                                                                                             |
| v13 ← MAX v12          | <i>Input:</i> [12, 3, 8, 8, 12, 6, 11, 2], [246, 113, 222, 18, 144, 250, 6, 63]                                             |
| v14 ← TAKE v2 v12      | <i>Output:</i> [26, 52, 70, 88, 102, 110]                                                                                   |
| v15 ← TAKE v13 v14     |                                                                                                                             |

|                     |                                                                              |
|---------------------|------------------------------------------------------------------------------|
| v0 ← [list]         | <i>Input:</i> [0, 2, 2, 3, 3], 238                                           |
| v1 ← [int]          | <i>Output:</i> [4]                                                           |
| v2 ← TAIL v0        |                                                                              |
| v3 ← ACCESS v2 v0   | <i>Input:</i> [10, 8, 6, 2, 8, 0, 10, 3, 6, 0, 3, 1, 2], 197                 |
| v4 ← TAKE v1 v0     | <i>Output:</i> [3, 2, 4, 7, 4]                                               |
| v5 ← FILTER (>0) v4 |                                                                              |
| v6 ← TAIL v5        | <i>Input:</i> [2, 1, 1, 1], 125                                              |
| v7 ← ACCESS v6 v5   | <i>Output:</i> [2]                                                           |
| v8 ← DROP v3 v5     |                                                                              |
| v9 ← MAX v8         |                                                                              |
| v10 ← TAKE v9 v8    | <i>Input:</i> [4, 8, 10, 13, 6, 5, 1, 8, 1, 5, 2, 10, 13, 4, 6, 9, 3, 4], 11 |
| v11 ← REVERSE v10   | <i>Output:</i> [3, 6, 2, 9, 2]                                               |
| v12 ← SUM v11       |                                                                              |
| v13 ← TAKE v7 v11   | <i>Input:</i> [0, 1, 1], 72                                                  |
| v14 ← TAKE v12 v13  | <i>Output:</i> [2]                                                           |
| v15 ← MAP (+1) v14  |                                                                              |

### 3 Impact of DSL instructions

To assess which parts of the DSL are more problematic, we have sorted the functions by the frequency in failing experiments with the function normalized by its overall frequency. As might be expected, the "easiest" functions are: TAKE, SUM, COUNT, and the "hardest" are DROP, REVERSE, MAP.

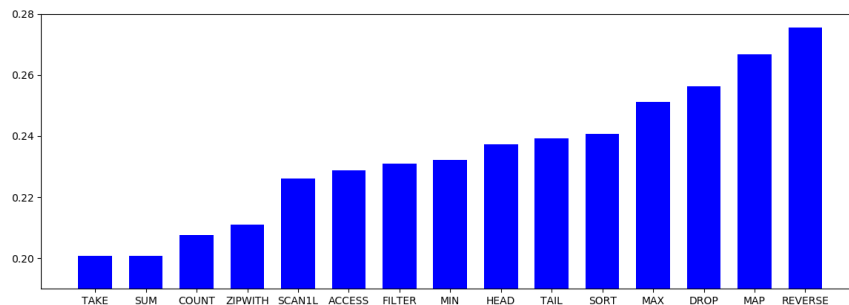

### References

- [1] David Silver, Aja Huang, Chris J. Maddison, Arthur Guez, Laurent Sifre, George van den Driessche, Julian Schrittwieser, Ioannis Antonoglou, Veda Panneershelvam, Marc Lanctot, Sander Dieleman, Dominik Grewe, John Nham, Nal Kalchbrenner, Ilya Sutskever, Timothy Lillicrap, Madeleine Leach, Koray Kavukcuoglu, Thore Graepel, and Demis Hassabis. Mastering the game of go with deep neural networks and tree search. *Nature*, 529:484 EP –, Jan 2016. Article.
- [2] Jonathan Ho and Stefano Ermon. Generative adversarial imitation learning. In D. D. Lee, M. Sugiyama, U. V. Luxburg, I. Guyon, and R. Garnett, editors, *NIPS*, pages 4565–4573. Curran Associates, Inc., 2016.
- [3] Steven J. Rennie, Etienne Marcheret, Youssef Mroueh, Jarret Ross, and Vaibhava Goel. Self-critical sequence training for image captioning. *CVPR*, pages 1179–1195, 2017.
- [4] Volodymyr Mnih, Adria Puigdomenech Badia, Mehdi Mirza, Alex Graves, Timothy Lillicrap, Tim Harley, David Silver, and Koray Kavukcuoglu. Asynchronous methods for deep reinforcement learning. In *ICML*, volume 48, 2016.
